# Supplementary material for: Dynamics of bridge–loop transformation in a membrane with mixed monolayer/bilayer structures
Source: Royal Society of Chemistry journal article supplement (doi:10.1039/c7cp08107c), 2018-01-01
Supplement: c7cp08107c1.pdf [file c7cp08107c1.pdf]

## Supporting Information

### Dynamics of bridge-loop transformation in a membrane with mixed monolayer/bilayer structures

Yan-Ling Yang<sup>1</sup>, Min-Yi Chen<sup>1</sup>, Heng-Kwong Tsao<sup>2,\*</sup> and Yu-Jane Sheng<sup>1,\*</sup>

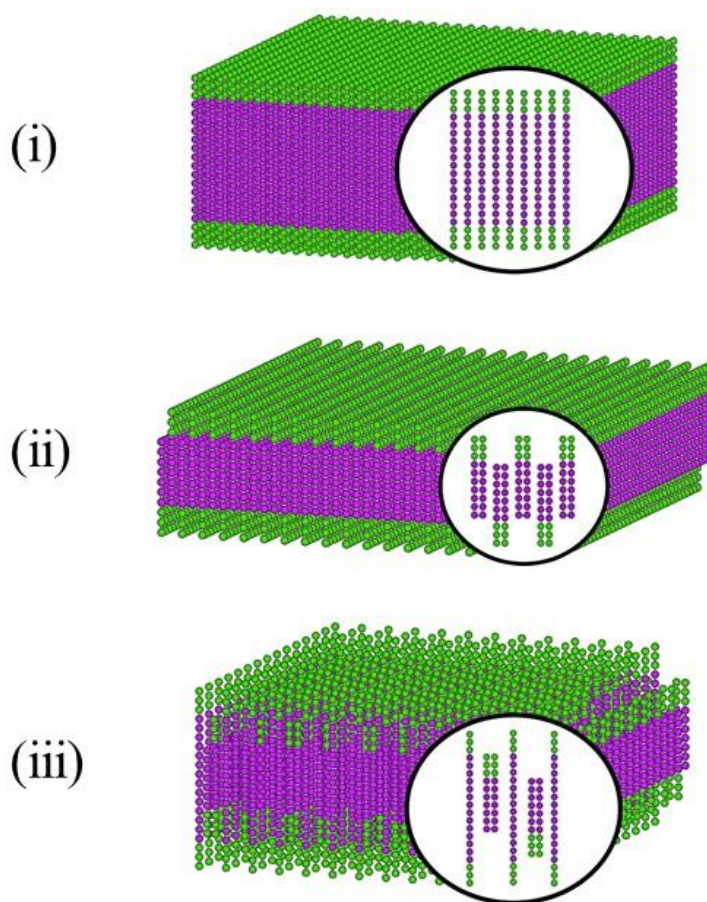

**Figure S1.** The initial configurations of the membranes formed by  $A_3B_{14}A_3$  triblock copolymers are shown : (i) for I-shaped monolayer membrane, (ii) for U-shaped bilayer membrane, and (iii) for mixed I-shaped/U-shaped membranes.
